# Supplementary material for: Differential Repeated Sprinting Training in Youth Basketball Players: An Analysis of Effects According to Maturity Status
Source: MDPI journal article supplement (doi:10.3390/ijerph191912265), 2022-09-27
Supplement: s1 [file s1]

**Table S1.** Training program variations.

| Week           |       | 1       | 2       | 3       | 4       | 5       | 6       | 7       | 8       | 9       |
|----------------|-------|---------|---------|---------|---------|---------|---------|---------|---------|---------|
| Starting type  |       | Regular | Regular | Regular | Regular | Rolling | Rolling | Rolling | Rolling | Regular |
| Finishing type |       | Regular | Regular | Regular | Jump    | Regular | Jump    | COD     | Turn    | Dec     |
| Variations     | Day 1 | 37      | 66      | 34      | 43      | 41      | 29      | 5       | 28      | 73      |
|                |       | 78      | 64      | 36      | 3       | 8       | 11      | 17      | 46      | 49      |
|                |       | 10      | 69      | 18      | 28      | 54      | 19      | 68      | 86      | 78      |
|                |       | 46      | 55      | 6       | 21      | 72      | 86      | 67      | 64      | 27      |
|                |       | 50      | 70      | 22      | 2       | 71      | 32      | 51      | 55      | 63      |
|                |       | 28      | 82      | 19      | 15      | 84      | 80      | 41      | 32      | 11      |
|                |       | 71      | 23      | 79      | 70      | 15      | 78      | 24      | 82      | 68      |
|                |       | 25      | 23      | 35      | 57      | 55      | 4       | 5       | 48      | 55      |
|                |       | 51      | 85      | 34      | 56      | 71      | 68      | 57      | 47      | 22      |
|                |       | 27      | 49      | 54      | 67      | 82      | 64      | 79      | 37      | 81      |
|                |       | 72      | 3       | 61      | 36      | 67      | 33      | 77      | 15      | 33      |
|                |       | 9       | 43      | 7       | 80      | 42      | 58      | 70      | 33      | 14      |
|                |       | 60      | 16      | 71      | 10      | 43      | 51      | 56      | 12      | 74      |
|                |       | 77      | 40      | 1       | 66      | 67      | 28      | 3       | 1       | 72      |
|                |       | 15      | 34      | 51      | 75      | 61      | 78      | 24      | 83      | 1       |
|                |       | 44      | 80      | 64      | 31      | 41      | 60      | 81      | 43      | 25      |
|                |       | 11      | 18      | 8       | 41      | 68      | 12      | 71      | 84      | 86      |
|                |       | 17      | 21      | 45      | 55      | 30      | 14      | 48      | 71      | 13      |
|                |       | 65      | 61      | 42      | 79      | 33      | 10      | 14      | 65      | 70      |
|                |       | 80      | 85      | 12      | 63      | 44      | 18      | 69      | 60      | 59      |
|                | Day 2 | 66      | 25      | 64      | 16      | 54      | 34      | 21      | 39      | 43      |
|                |       | 64      | 81      | 43      | 82      | 26      | 21      | 5       | 76      | 69      |
|                |       | 71      | 23      | 6       | 69      | 63      | 38      | 18      | 70      | 5       |
|                |       | 21      | 19      | 63      | 76      | 45      | 6       | 78      | 72      | 34      |
|                |       | 48      | 1       | 37      | 61      | 38      | 53      | 57      | 83      | 22      |
|                |       | 57      | 5       | 5       | 17      | 2       | 77      | 52      | 51      | 73      |
|                |       | 76      | 40      | 39      | 13      | 74      | 66      | 82      | 58      | 16      |
|                |       | 62      | 70      | 27      | 11      | 16      | 52      | 7       | 30      | 36      |
|                |       | 74      | 48      | 62      | 74      | 41      | 57      | 68      | 65      | 65      |
|                |       | 24      | 55      | 38      | 57      | 75      | 58      | 12      | 86      | 86      |
|                |       | 59      | 2       | 82      | 14      | 48      | 56      | 25      | 52      | 76      |
|                |       | 63      | 15      | 16      | 51      | 24      | 67      | 29      | 28      | 70      |
|                |       | 54      | 83      | 75      | 77      | 84      | 42      | 21      | 1       | 32      |
|                |       | 20      | 80      | 19      | 25      | 4       | 7       | 6       | 27      | 72      |
|                |       | 3       | 72      | 30      | 24      | 55      | 54      | 27      | 60      | 24      |
|                |       | 4       | 8       | 43      | 83      | 34      | 3       | 77      | 29      | 10      |
|                |       | 62      | 18      | 61      | 79      | 81      | 72      | 64      | 25      | 71      |
|                |       | 22      | 27      | 23      | 30      | 72      | 40      | 47      | 36      | 45      |

|  |  |    |    |    |   |    |    |    |    |    |
|--|--|----|----|----|---|----|----|----|----|----|
|  |  | 77 | 61 | 2  | 6 | 35 | 66 | 54 | 56 | 38 |
|  |  | 60 | 17 | 55 | 2 | 22 | 68 | 30 | 52 | 60 |

**Note:** The full description of each number is available at table 2. Abbreviations: Dec = Deceleration.
