# Supplementary material for: Differential Repeated Sprinting Training in Youth Basketball Players: An Analysis of Effects According to Maturity Status
Source: MDPI journal article supplement (doi:10.3390/ijerph191912265), 2022-09-27
Supplement: s1 [file s1]

**Table S2.** Examples of the fluctuations performed during differential repeated sprint training interventions.

| #  | Body part | Fluctuations                                        | #  | Body part | Fluctuations                                 |
|----|-----------|-----------------------------------------------------|----|-----------|----------------------------------------------|
| 1  | Head      | Head back                                           | 53 | Scapula   | Scapula elevated                             |
| 2  |           | Head forward                                        | 54 |           | Right scapula elevated                       |
| 3  |           | Head back and forward                               | 55 |           | Left scapula elevated                        |
| 4  |           | Head rotated to the left                            | 56 |           | Scapula retracted                            |
| 5  |           | Head rotated to the right                           | 57 |           | Right scapula retracted                      |
| 6  |           | Head rotated left and right                         | 58 |           | Left scapula retracted                       |
| 7  |           | Head tilted to the left                             | 59 |           | Scapula depressed                            |
| 8  |           | Head tilted to the right                            | 60 |           | Right scapula depressed                      |
| 9  |           | Head tilted to the right and left                   | 61 |           | Left scapula depressed                       |
| 10 |           | Head circumduction to the left                      | 62 |           | Scapula protracted                           |
| 11 |           | Head circumduction to the right                     | 63 |           | Right scapula protracted                     |
| 12 | Eyes      | Right eye closed                                    | 64 | Trunk     | Left scapula protracted                      |
| 13 |           | Left eye closed                                     | 65 |           | Trunk rotation to the left                   |
| 14 |           | Blinking right eye                                  | 66 |           | Trunk rotation to the right                  |
| 15 |           | Blinking left eye                                   | 67 |           | Trunk rotation to the right and left         |
| 16 |           | Blinking eyes                                       | 68 |           | Trunk tilted laterally to the left           |
| 17 |           | Look to the right                                   | 69 |           | Trunk tilted laterally to the right          |
| 18 |           | Look to the left                                    | 70 |           | Trunk tilted laterally to the left and right |
| 19 |           | Look to the right + Blinking eyes                   | 71 |           | Trunk tilted back                            |
| 20 |           | Look to the left + Blinking eyes                    | 72 |           | Trunk tilted forward                         |
| 21 |           | Cover left eye with left hand                       | 73 |           | Trunk tilted back and forward                |
| 22 |           | Cover left eye with right hand                      | 74 | Hands     | Hands on hip                                 |
| 23 |           | Cover right eye with left hand                      | 75 |           | Right hand on hip                            |
| 24 |           | Cover right eye with right hand                     | 76 |           | Left hands on hip                            |
| 25 |           | Look to the right + Cover left eye with left hand   | 77 |           | Hands behind head                            |
| 26 |           | Look to the right + Cover left eye with right hand  | 78 |           | Hands on forehead                            |
| 27 |           | Look to the right + Cover right eye with left hand  | 79 |           | Right hand behind head                       |
| 28 |           | Look to the right + Cover right eye with right hand | 80 |           | Left hand behind head                        |
| 29 |           | Look to the left + Cover left eye with left hand    | 81 |           | Hands behind back                            |
| 30 |           | Look to the left + Cover left eye with right hand   | 82 |           | Right hand behind back                       |
| 31 |           | Look to the left + Cover right eye with left hand   | 83 |           | Left hand behind back                        |
| 32 |           | Look to the left + Cover right eye with right hand  | 84 |           | Clapping ahead                               |
| 33 | Arms      | Simultaneous swing straight arms                    | 85 |           | Clap behind back                             |
| 34 |           | Alternated swing straight arms                      | 86 |           | Clap front and back                          |
| 35 |           | Static two arms up                                  |    |           |                                              |
| 36 |           | Two arms up with hand pronation and supination      |    |           |                                              |
| 37 |           | Two arms close to the torso                         |    |           |                                              |
| 38 |           | Simultaneous forward arm rotation                   |    |           |                                              |
| 39 |           | Simultaneous backward arm rotation                  |    |           |                                              |
| 40 |           | Alternated forward arm rotation                     |    |           |                                              |
| 41 |           | Alternated backward arm rotation                    |    |           |                                              |
| 42 |           | Simultaneous arm abduction and adduction            |    |           |                                              |
| 43 |           | Alternated arm abduction and adduction              |    |           |                                              |
| 44 |           | Arms open to the side                               |    |           |                                              |
| 45 |           | Arms open down                                      |    |           |                                              |
| 46 |           | Crossed arms                                        |    |           |                                              |
| 47 |           | Arms stretched forward                              |    |           |                                              |
| 48 |           | Arms stretched back                                 |    |           |                                              |
| 49 |           | Right arm up + left arm down                        |    |           |                                              |
| 50 |           | Left arm up + right arm down                        |    |           |                                              |
| 51 |           | Left arm up + right arm to the side                 |    |           |                                              |
| 52 |           | Right arm up + left arm to the side                 |    |           |                                              |
